# Supplementary material for: Multi-nanocomponent-assembled films with exceptional capacitance performance and electromagnetic interference shielding
Source: Royal Society of Chemistry journal article supplement (doi:10.1039/d2qm00418f), 2022-01-01
Supplement: d2qm00418f1.pdf [file d2qm00418f1.pdf]

## Supporting Information

### **Multi-nanocomponent-assembled films with exceptional capacitance performance and electromagnetic interference shielding**

Jianyong Yu<sup>a,†</sup>, Zhanhui Yuan<sup>a,†</sup>, Liwei Wang<sup>b,\*</sup>, Shuo Chen<sup>c</sup>, Weiwei Wei<sup>c</sup>, Fan Zhang<sup>c,\*</sup>

<sup>a</sup> College of Materials Science and Engineering, Fujian Agriculture and Forestry University, Shangxiadian Road 15, 350002 Fuzhou, P. R. China

<sup>b</sup> Ocean College, Minjiang University, Fuzhou 350108, China

E-mail: wlw@mju.edu.cn

<sup>c</sup> School of Chemistry and Chemical Engineering, Shanghai Jiao Tong University, Dongchuan Road 800, 200240 Shanghai, P. R. China

E-mail: fan-zhang@sjtu.edu.cn (F. Z.)

<sup>†</sup>Jianyong Yu and Zhanhui Yuan contributed equally to this work.

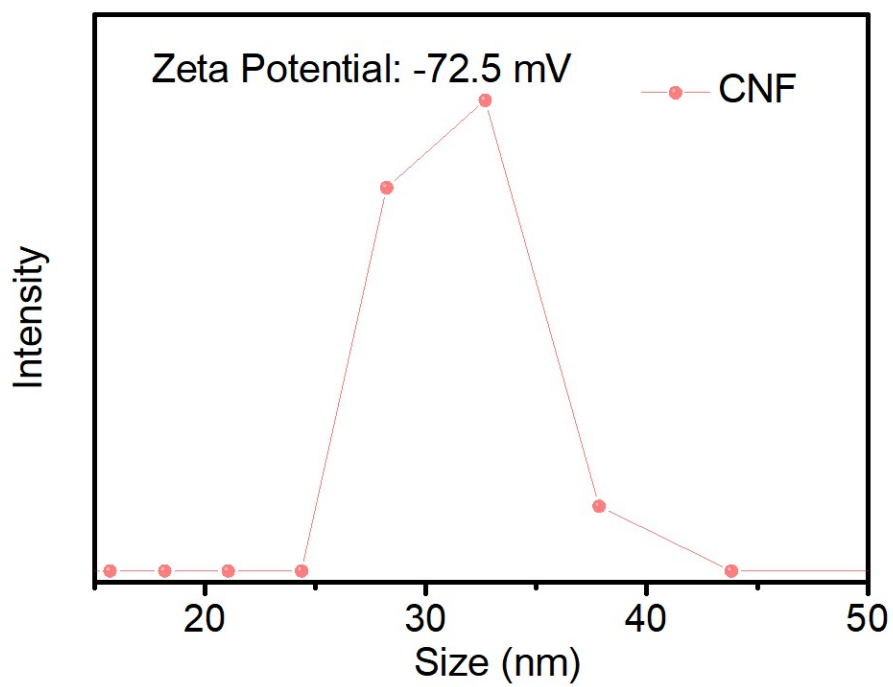

**Figure S1.** Zeta potential of a CNF dispersion

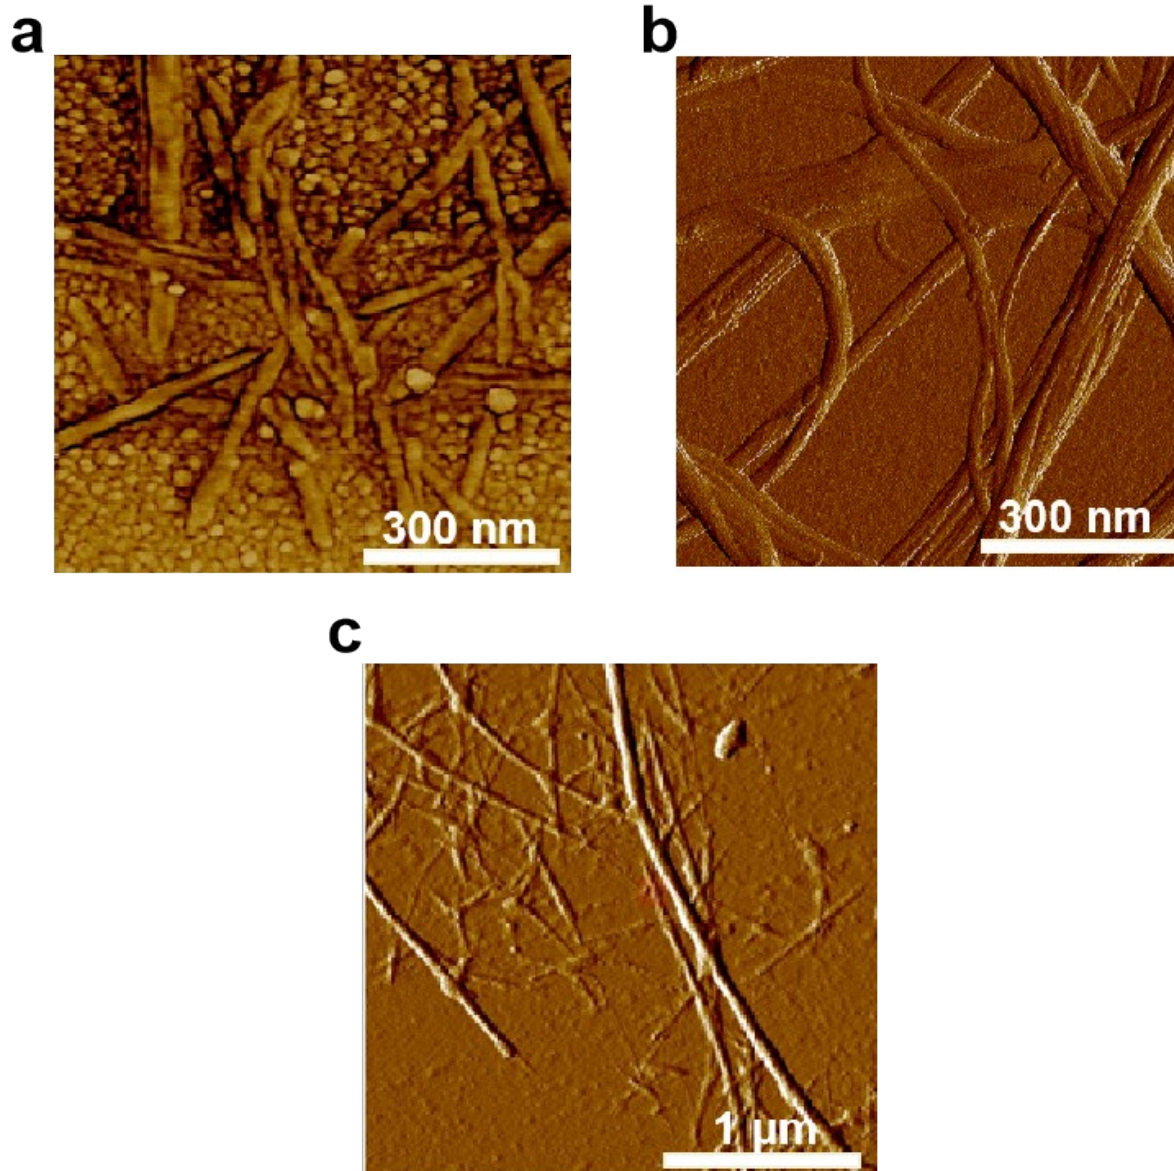

**Figure S2.** (a-c) AFM image of CNFs, SWCNTs and CNF@CNT, respectively.

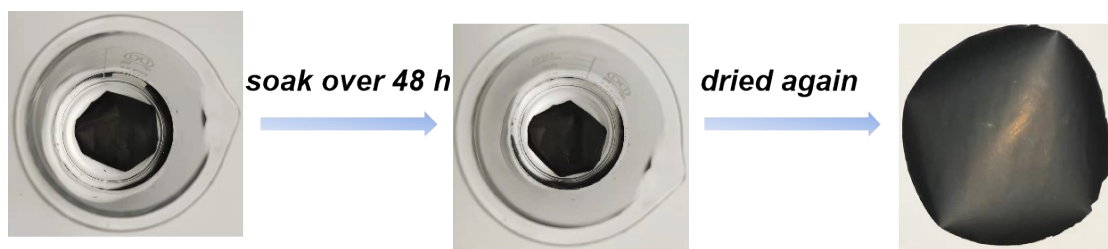

**Figure S3.** The Digital photographs of CNF@CNT@RGO films were soaked in water for 48 hours and dried again under 60 °C

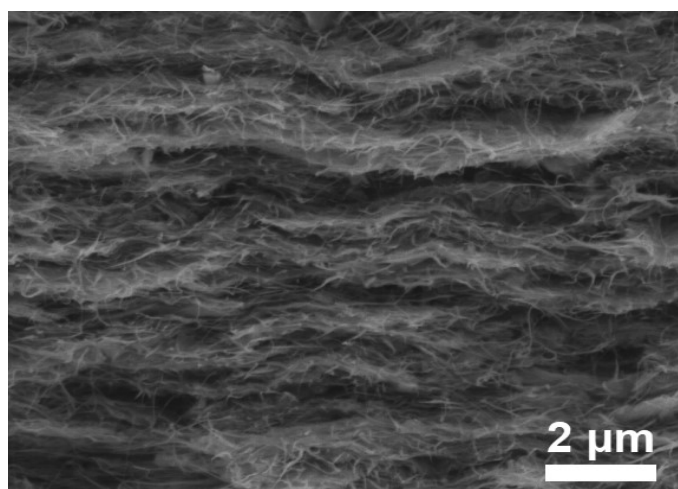

**Figure S4.** The side views of SEM images of CNF@CNT@RGO films.

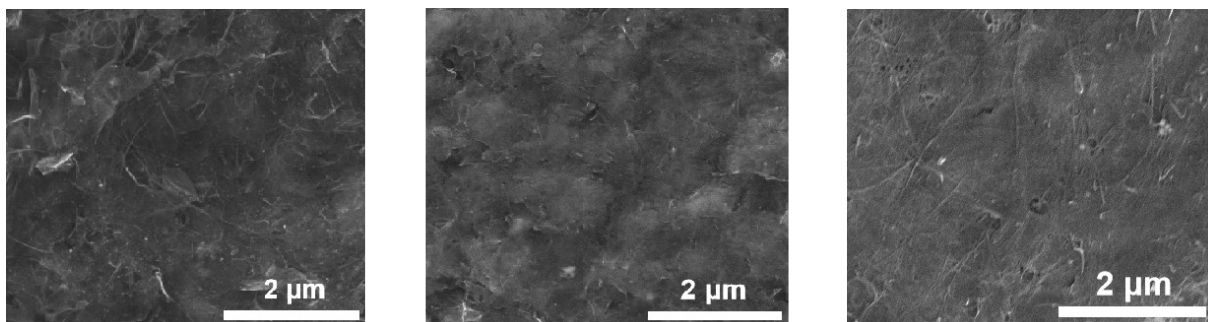

**Figure S5.** (a-c) Top views of SEM images of 10 μm, 50 μm and 125 μm, respectively

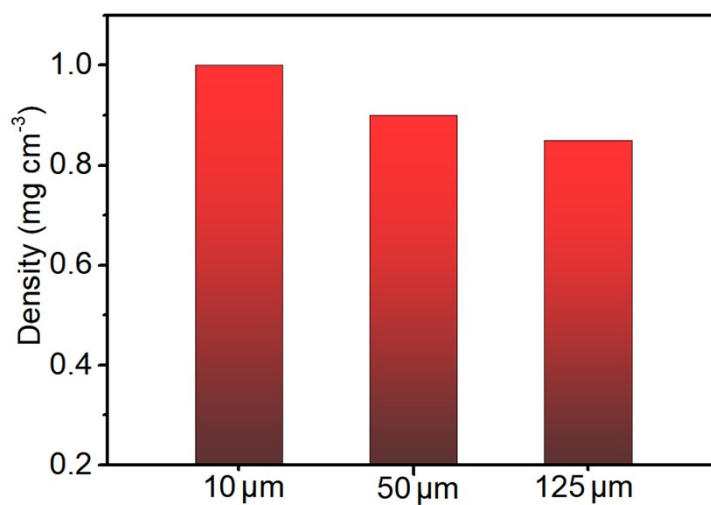

**Figure S6.** The density of 10 μm, 50 μm and 125 μm.

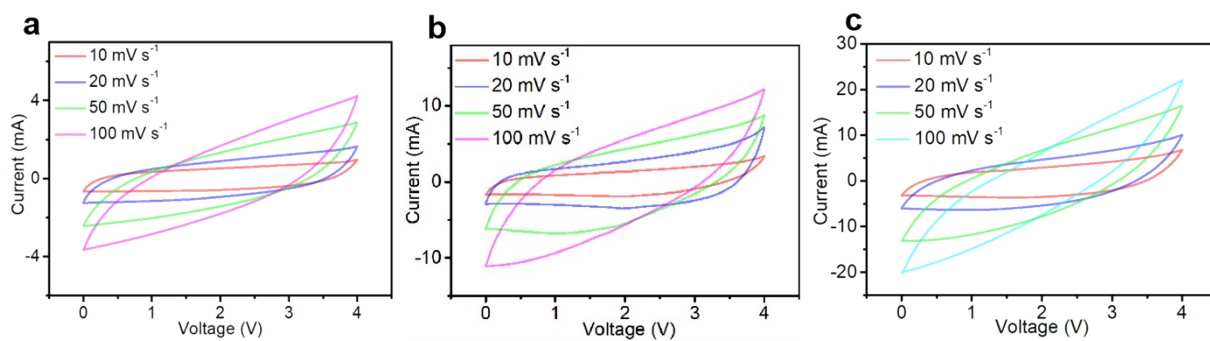

**Figure S7.** a-c)The CV curve at different scan rates of 10  $\mu\text{m}$ , 50  $\mu\text{m}$  and 125  $\mu\text{m}$ , respectively.

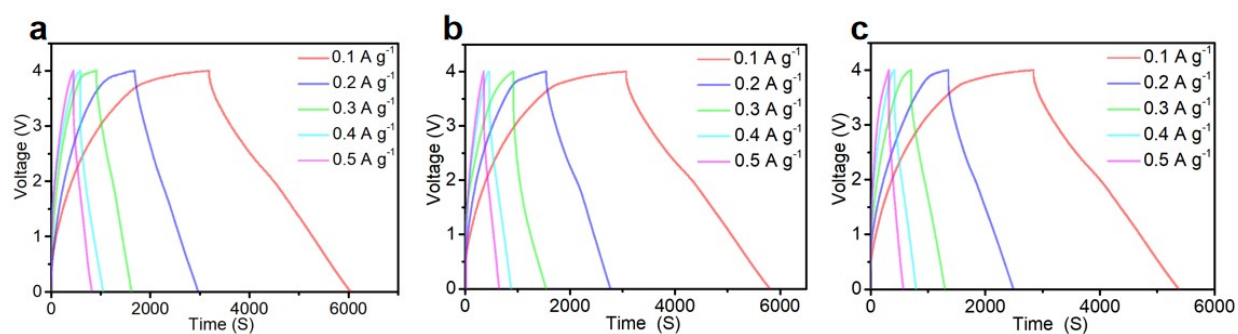

**Figure S8.** a-c)The GCD curve at different current density of 10  $\mu\text{m}$ , 50  $\mu\text{m}$  and 125  $\mu\text{m}$ , respectively.

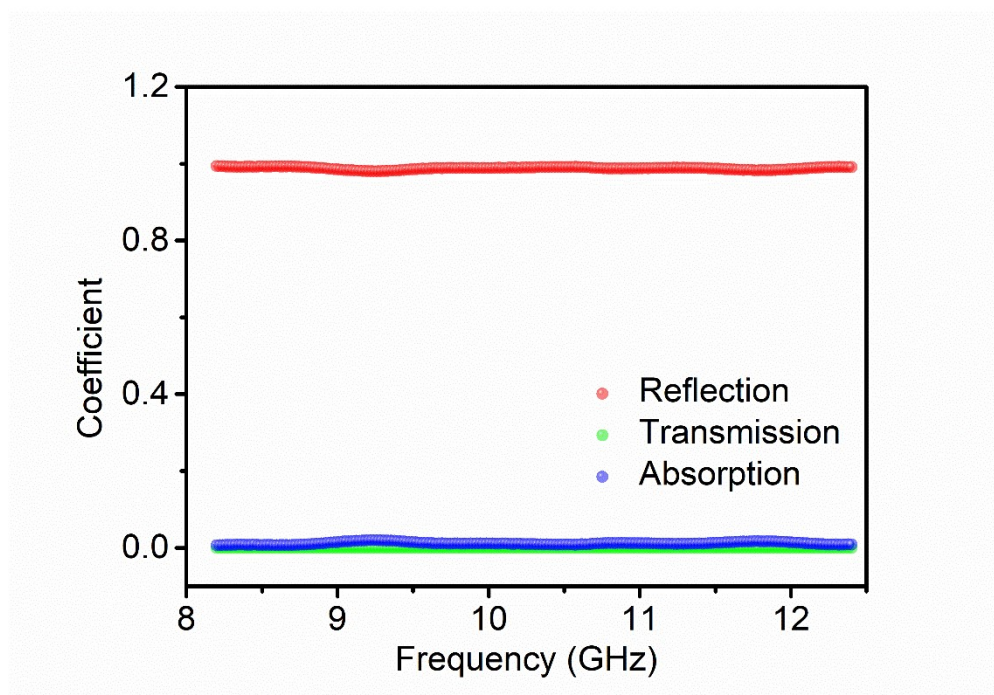

**Figure S9.** Reflection, absorption, and transmission coefficients of CNF@CNT@RGO in the X-band.

**Table S1.** Conductivity of

films of different thickness

| Samples | Conductivity<br>(S cm <sup>-1</sup> ) |
|---------|---------------------------------------|
| 10 μm   | 462.9                                 |
| 50 μm   | 307.7                                 |
| 125 μm  | 222.2                                 |

**Table S2.** Comparison of EMI shielding performances for various carbon based materials

| Type                   | Material                                   | Thickness (mm) | Frequency Ranges (GHz) | EMI SE (dB) | Ref |
|------------------------|--------------------------------------------|----------------|------------------------|-------------|-----|
| Reduced Graphene Oxide | RGO/CNC                                    | 0.012          | 8.2-12.5               | 39.1        | 1   |
|                        | RGO-Fe <sub>2</sub> O <sub>3</sub> -PVA    | 0.36           | 8.2-12.5               | 20.3        | 2   |
|                        | RGO-Fe <sub>2</sub> O <sub>3</sub> -PEI    | 2.5            | 8.2-12.5               | 18.2        | 3   |
|                        | RGO/CNF                                    | 0.023          | 8.2-12.5               | 26.2        | 4   |
|                        | RGO/EG                                     | 0.043          | 8.2-12.5               | 48.3        | 5   |
|                        | RGO/WPU                                    | 1              | 8.2-12.5               | 48.1        | 6   |
|                        | RGO@Fe <sub>3</sub> O <sub>4</sub> /EP     | 1              | 8.2-12.5               | 13.45       | 7   |
|                        | RGO/MXene                                  | 3              | 8.2-12.5               | 50.7        | 8   |
|                        | RGO/PDMS                                   | 2              | 8.2-12.5               | 54.2        | 9   |
|                        | RGO                                        | 0.0084         | 8.2-12.5               | 20          | 10  |
|                        | G-foam                                     | 0.3            | 8.2-12.5               | 42.3        | 11  |
|                        | LC/RGO                                     | 2              | 8.2-12.5               | 70.5        | 12  |
|                        | PI/RGO/MWCNTs                              | 0.5            | 8.2-12.5               | 18.2        | 13  |
|                        | RGO/PI                                     | 0.5            | 8-12                   | 14.9        | 14  |
|                        | Fe <sub>3</sub> O <sub>4</sub> /TAGA/epoxy | 3              | 8.2-12.5               | 35          | 15  |
|                        | sRGO/PS                                    | 2.5            | 8.2-12.5               | 45.1        | 16  |
|                        | RGO-Fe <sub>2</sub> O <sub>3</sub> /PANI   | 2.5            | 8.2-12.5               | 51          | 17  |
|                        | RGO-CNT/PDMS                               | 2              | 8.2-12.5               | 31          | 18  |
|                        | GCFs                                       | 0.012          | 8-12                   | 57          | 19  |
|                        | TGAs                                       | 2.5            | 8.2-12.5               | 43.29       | 20  |
|                        | RGO/LDC                                    | 2              | 8.2-12.5               | 49.2        | 21  |
|                        | SRGO                                       | 4              | 8-40                   | 70.2        | 22  |
|                        | CNTs/RGO                                   | 3.1            | 8.2-12.5               | 49          | 23  |
|                        | CCA@RGO/PDMS                               | 3              | 8.2-12.5               | 51          | 24  |
| Graphene Oxide         | GO-EG-Fe <sub>2</sub> O <sub>3</sub> -PI   | 0.085          | 8.2-12.5               | 34          | 25  |
|                        | Ag NWs/GO                                  | 0.008          | 8.2-12.5               | 62          | 26  |
| High-quality Graphene  | fGnP90@PANF                                | 0.021          | 8.2-12.5               | 48.2        | 27  |
|                        | PG/PI                                      | 0.025          | 8.2-12.5               | 60.2        | 28  |
|                        | Fe <sub>3</sub> O <sub>4</sub> /GN         | 0.25           | 8.2-12.5               | 24          | 29  |
|                        | 3DGMTs                                     | 1.5            | 8.2-12.5               | 38          | 30  |
|                        | PI/graphene                                | 2.5            | 8.2-12.5               | 28.8        | 31  |
|                        | HPG                                        | 0.0483         | 8.2-12.5               | 61.8        | 32  |



|  |                    |              |                 |           |                  |
|--|--------------------|--------------|-----------------|-----------|------------------|
|  | Ni@G-P             | 0.7          | 8.2-12.5        | 51.4      | 33               |
|  | GNPs               | 0.18         | 8.2-12.5        | 58.1      | 34               |
|  | D-LIG/Ni           | 0.327        | 8.2-12.5        | 79        | 35               |
|  | <b>CNF@CNT@RGO</b> | <b>0.125</b> | <b>8.2-12.5</b> | <b>75</b> | <b>This work</b> |

## Reference:

- 1 K. Jin, J. Xing, X. Liu, Z. Jiang, S. Yang, X. Yang, J. Ma, Manipulating the assembly of the CNC/RGO composite film for superior electromagnetic interference shielding properties, *J. Mater. Chem. A*, 2021, **9**, 26999–27009.
- 2 B. Yuan, C. Bao, X. Qian, L. Song, Q. Tai, K. M. Liew, Y. Hu, Design of artificial nacre-like hybrid films as shielding to mitigate electromagnetic pollution, *Carbon*, 2014, **75**, 178–189.
- 3 B. Shen, W. Zhai, M. Tao, J. Ling, W. Zheng, Lightweight, multifunctional polyetherimide/graphene@Fe<sub>3</sub>O<sub>4</sub> composite foams for shielding of electromagnetic pollution, *ACS Appl. Mater. Interfaces*, 2013, **5**, 11383–11391.
- 4 W. Yang, Z. Zhao, K. Wu, R. Huang, T. Liu, H. Jiang, F. Chen and Q. Fu, *J. Mater. Chem. C*, 2017, **5**, 3748–3756.
- 5 Y. Liu, J. Zeng, D. Han, K. Wu, B. Yu, S. Chai, F. Chen, Q. Fu, Ultrathin flexible reduced graphene oxide/cellulose nanofiber composite films with strongly anisotropic thermal conductivity and efficient electromagnetic interference shielding, *Carbon*, 2018, **133**, 435–445.
- 6 Y. Wang, W. Wang, R. Xu, M. Zhu, D. Yu, Flexible, durable and thermal conducting thiol-modified rGO-WPU/cotton fabric for robust electromagnetic interference shielding. *Chem. Eng. J.*, 2019, **360**, 817–828.
- 7 Y. Liu, M. Lu, K. Wu, S. Yao, X. Du, G. Chen, Q. Zhang, L. Liang, M. Lu, Anisotropic thermal conductivity and electromagnetic interference shielding of epoxy nanocomposites based on magnetic driving reduced graphene oxide@Fe<sub>3</sub>O<sub>4</sub>, *Compos. Sci. Technol.*, 2019, **174**, 1–10.
- 8 Z. Fan, D. Wang, Y. Yuan, Y. Wang, Z. Cheng, Y. Liu, Z. Xie, A lightweight and conductive MXene/graphene hybrid foam for superior electromagnetic interference shielding, *Chem. Eng. J.*, 2020, **381**, 122696.
- 9 F. Xu, R. Chen, Z. Lin, Y. Qin, Y. Yuan, Y. Li, X. Zhao, M. Yang, X. Sun, S. Wang, Q. Peng, Y. Li, X. He, Superflexible Interconnected Graphene Network Nanocomposites for High-Performance Electromagnetic Interference Shielding, *ACS Omega*, 2018, **3**, 3599–3607.
- 10 B. Shen, W. Zhai, W. Zheng, Ultrathin flexible graphene film: An excellent thermal conducting material with efficient EMI shielding, *Adv. Funct. Mater.*, 2014, **24**, 4542–4548.
- 11 B. Shen, Y. Li, D. Yi, W. Zhai, X. Wei, W. Zheng, Microcellular graphene foam for improved broadband electromagnetic interference shielding, *Carbon*, 2016, **102**, 154–160.
- 12 Z. Zeng, Y. Zhang, X. Y. D. Ma, S. I. S. Shahabadi, B. Che, P. Wang, X. Lu, Biomass-based honeycomb-like architectures for preparation of robust carbon foams with high electromagnetic interference shielding performance, *Carbon*, 2018, **140**, 227–236.

- 13 H. Yang, Z. Yu, P. Wu, H. Zou, P. Liu, Electromagnetic interference shielding effectiveness of microcellular polyimide/in situ thermally reduced graphene oxide/carbon nanotubes nanocomposites, *Appl. Surf. Sci.*, 2018, **434**, 318–325.
- 14 H. Yang, Z. Li, H. Zou, P. Liu, Preparation of porous polyimide/in-situ reduced graphene oxide composite films for electromagnetic interference shielding, *Polym. Adv. Technol.*, 2017, **28**, 233–242.
- 15 Y. Huangfu, K. Ruan, H. Qiu, Y. Lu, C. Liang, J. Kong, J. Gu, Fabrication and investigation on the PANI/MWCNT/thermally annealed graphene aerogel/epoxy electromagnetic interference shielding nanocomposites, *Compos. Part A Appl. Sci. Manuf.*, 2019, **121**, 265–272.
- 16 D. X. Yan, H. Pang, B. Li, R. Vajtai, L. Xu, P. G. Ren, J. H. Wang, Z. M. Li, Structured reduced graphene oxide/polymer composites for ultra-efficient electromagnetic interference shielding, *Adv. Funct. Mater.*, 2015, **25**, 559–566.
- 17 A. P. Singh, M. Mishra, P. Sambyal, B. K. Gupta, B. P. Singh, A. Chandra, S. K. Dhawan, Encapsulation of  $\gamma$ -Fe<sub>2</sub>O<sub>3</sub> decorated reduced graphene oxide in polyaniline core-shell tubes as an exceptional tracker for electromagnetic environmental pollution, *J. Mater. Chem. A*, 2014, **2**, 3581–3593.
- 18 S. Zhao, Y. Yan, A. Gao, S. Zhao, J. Cui, G. Zhang, Flexible Polydimethylsilane Nanocomposites Enhanced with a Three-Dimensional Graphene/Carbon Nanotube Bicontinuous Framework for High-Performance Electromagnetic Interference Shielding, *ACS Appl. Mater. Interfaces*, 2018, **10**, 26723–26732.
- 19 L. Zhang, Y. Chen, Q. Liu, W. Deng, Y. Yue, F. Meng, Ultrathin flexible electrospun carbon nanofibers reinforced graphene microgasbags films with three-dimensional conductive network toward synergetic enhanced electromagnetic interference shielding, *J. Mater. Sci. Technol.*, 2022, **111**, 57–65.
- 20 C. B. Li, Y. J. Li, Q. Zhao, Y. Luo, G. Y. Yang, Y. Hu, J. J. Jiang, Electromagnetic Interference Shielding of Graphene Aerogel with Layered Microstructure Fabricated via Mechanical Compression, *ACS Appl. Mater. Interfaces*, 2020, **12**, 30686–30694.
- 21 Z. Zeng, C. Wang, Y. Zhang, P. Wang, S. I. Seyed Shahabadi, Y. Pei, M. Chen, X. Lu, Ultralight and Highly Elastic Graphene/Lignin-Derived Carbon Nanocomposite Aerogels with Ultrahigh Electromagnetic Interference Shielding Performance, *ACS Appl. Mater. Interfaces*, 2018, **10**, 8205–8213.
- 22 L. Feng, Q. Song, X. He, Z. Zhang, X. Hou, X. Ye, Y. Yang, G. Suo, L. Zhang, Q. G. Fu, H. Li, High-performance multifunctional carbon-silicon carbide composites with strengthened reduced graphene oxide, *ACS Nano*, 2021, **15**, 2880–2892.
- 23 L. Kong, X. Yin, H. Xu, X. Yuan, T. Wang, Z. Xu, J. Huang, R. Yang, H. Fan, Powerful absorbing and lightweight electromagnetic shielding CNTs/RGO composite, *Carbon*, 2019, **145**, 61–66.
- 24 P. Song, B. Liu, C. Liang, K. Ruan, H. Qiu, Z. Ma, Y. Guo, J. Gu, Lightweight, Flexible Cellulose-Derived Carbon Aerogel@Reduced Graphene Oxide/PDMS Composites with Outstanding EMI Shielding Performances and Excellent Thermal Conductivities, *Nano-Micro Lett.*, 2021, **13**, 91.
- 25 Y. Guo, H. Qiu, K. Ruan, Y. Zhang, J. Gu, Hierarchically Multifunctional Polyimide Composite Films with Strongly Enhanced Thermal Conductivity, *Nano-Micro Lett.*, 2022, **14**, 26.
- 26 H. Jia, X. Yang, Q. Q. Kong, L. J. Xie, Q. G. Guo, G. Song, L. L. Liang, J. P. Chen, Y. Li, C. M. Chen, Free-standing, anti-corrosion, super flexible graphene oxide/silver nanowire thin films for ultra-wideband electromagnetic interference shielding, *J. Mater. Chem. A*, 2021, **9**, 1180–1191.
- 27 M. C. Vu, P. J. Park, S. R. Bae, S. Y. Kim, Y. M. Kang, W. K. Choi, M. A. Islam, J. C. Won, M. Park, S. R. Kim, Scalable ultrarobust thermoconductive nonflammable bioinspired papers of graphene nanoplatelet crosslinked aramid nanofibers for thermal management and electromagnetic shielding, *J. Mater. Chem. A*, 2021, **9**, 8527–8540.
- 28 Q. Wei, S. Pei, X. Qian, H. Liu, Z. Liu, W. Zhang, T. Zhou, Z. Zhang, X. Zhang, H. M. Cheng, W. Ren, Superhigh Electromagnetic Interference Shielding of Ultrathin Aligned Pristine Graphene Nanosheets Film, *Adv. Mater.*, 2020, **32**, 1907411.
- 29 W. L. Song, X. T. Guan, L. Z. Fan, W. Q. Cao, C. Y. Wang, Q. L. Zhao, M. S. Cao, Magnetic and conductive graphene papers toward thin layers of effective electromagnetic shielding, *J. Mater. Chem. A*, 2015, **3**, 2097–2107.
- 30 X. Yin, H. Li, L. Han, J. Meng, J. Lu, L. Zhang, W. Li, Q. Fu, K. Li, Q. Song, Lightweight and flexible 3D graphene microtubes membrane for high-efficiency electromagnetic-interference shielding, *Chem. Eng. J.*, 2020, **387**, 124025.

- 31 Z. Yu, T. Dai, S. Yuan, H. Zou , P. Liu, Electromagnetic Interference Shielding Performance of Anisotropic Polyimide/Graphene Composite Aerogels, *ACS Appl. Mater. Interfaces*, 2020, **12**, 30990–31001.
- 32 J. Xu, R. Li, S. Ji, B. Zhao, T. Cui, X. Tan, G. Gou, J. Jian, H. Xu, Y. Qiao, Y. Yang, S. Zhang , T. L. Ren, Multifunctional Graphene Microstructures Inspired by Honeycomb for Ultrahigh Performance Electromagnetic Interference Shielding and Wearable Applications, *ACS Nano*, 2021, **15**, 8907–8918.
- 33 L. Liang, P. Xu, Y. Wang, Y. Shang, J. Ma, F. Su, Y. Feng, C. He, Y. Wang , C. Liu, Flexible polyvinylidene fluoride film with alternating oriented graphene/Ni nanochains for electromagnetic interference shielding and thermal management, *Chem. Eng. J.*, 2020, **395**, 125209.
- 34 W. Y. Wang, X. Ma, Y. W. Shao, X. D. Qi, J. H. Yang, Y. Wang, Flexible, multifunctional, and thermally conductive nylon/graphene nanoplatelet composite papers with excellent EMI shielding performance, improved hydrophobicity and flame resistance, *J. Mater. Chem. A*, 2021, **9**, 5033–5044.
- 35 J. Yin, J. Zhang, S. Zhang, C. Liu, X. Yu, L. Chen, Y. Song, S. Han, M. Xi, C.e Zhang, N. Li , Z. Wang, Flexible 3D porous graphene film decorated with nickel nanoparticles for absorption-dominated electromagnetic interference shielding, *Chem. Eng. J.*, 2021, **421**, 129763.
